# Supplementary material for: Heat-resistant poly(methyl methacrylate) by modification with perfluorocyclobutyl methacrylamide monomers
Source: Royal Society of Chemistry journal article supplement (doi:10.1039/d5py01014d), 2026-01-01
Supplement: d5py01014d1.pdf [file d5py01014d1.pdf]

**Supporting Information For**  
**Heat-Resistant Poly(methyl methacrylate) by Modification with**  
**Perfluorocyclobutyl Methacrylamide Monomers**

*Gaoyang Du,<sup>#</sup> Yurong Xue,<sup>#</sup> Hemin Zhang, Xiaoyu Huang,\* Sen Zhang, Guolin Lu\**

State Key Laboratory of Fluorine and Nitrogen Chemistry and Advanced Materials,  
Shanghai Institute of Organic Chemistry, University of Chinese Academy of Sciences,  
Chinese Academy of Sciences, 345 Lingling Road, Shanghai 200032, People's  
Republic of China

\* To whom correspondence should be addressed, E-mail: luguolin@mail.sioc.ac.cn  
(Tel: +86-21-54925394, Fax: +86-21-64166128), xyhuang@mail.sioc.ac.cn (Tel: +86-  
21-54925310, Fax: +86-21-64166128).

## EXPERIMENTAL DETAILS

### Materials

Dimethylsulfoxide (DMSO, Alfa Aesar, 99%) was dried over  $\text{CaH}_2$  and distilled under reduced pressure prior to use. 2,2'-Azobis(isobutyronitrile) (AIBN, Aldrich, 98%) was recrystallized from anhydrous ethanol. Triethylamine (TEA, Alfa Aesar, 99%) was dried over KOH and distilled over  $\text{CaH}_2$  under  $\text{N}_2$  prior to use. Granular zinc was activated by washing in 0.1 N HCl followed by drying at  $140^\circ\text{C}$  *in vacuo* for 10 h. Tetrahydrofuran (THF) were dried over  $\text{CaH}_2$  for several days and distilled from sodium and benzophenone under  $\text{N}_2$  prior to use. Acetonitrile was dried over  $\text{CaH}_2$  and distilled under  $\text{N}_2$  prior to use. Methyl methacrylate (MMA, Aldrich, 99%) was purified by passing through a column of neutral alumina. 1,2-Dibromotetrafluoroethane (Macklin, 98%), caesium carbonate (Aldrich, 99%), 4-methoxyphenol (Aldrich, 99%), 4-bromophenol (Aldrich, 99%), tetrakis(triphenylphosphine)-palladium(0) (Aldrich, 99%), potassium carbonate (Aldrich, 99%), methacryloyl chloride (Alfa Aesar, 97%), ethylene dimethacrylate (EGDMA, Adamas, 98%) and 4-aminophenylboronic acid pinacol ester (Aldrich, 97%) were used as received unless otherwise specified.

### Instrumentation

$^1\text{H}$ ,  $^{13}\text{C}$  and  $^{19}\text{F}$  NMR spectra of intermediates were recorded on a JEOL resonance ECZ 400S spectrometer (400 MHz) in  $\text{CDCl}_3$ . Tetramethylsilane (TMS) and  $\text{CDCl}_3$  were used as internal standards for  $^1\text{H}$  and  $^{13}\text{C}$  NMR, respectively;  $\text{CF}_3\text{CO}_2\text{H}$  was used

as external standard for  $^{19}\text{F}$  NMR. FT-IR spectra were recorded on a Nicolet AVATAR-360 FT-IR spectrophotometer and PerkinElmer Spectrum Two with a  $4\text{ cm}^{-1}$  resolution. Number-average molecular weights ( $M_n$ ) and molecular weight distributions ( $M_w/M_n$ ) were obtained on a conventional gel permeation chromatography (GPC) system equipped with a Waters 515 Isocratic HPLC pump, a Waters 2414 refractive index detector, and a set of Waters Styragel columns (HR3 (500-30,000), HR4 (5,000-600,000) and HR5 (50,000-4,000,000),  $7.8\times 300\text{ mm}$ , particle size:  $5\text{ }\mu\text{m}$ ). GPC measurement was carried out at  $35^\circ\text{C}$  using tetrahydrofuran (THF) as eluent with a flow rate of  $1.0\text{ mL/min}$ . The system was calibrated with linear polystyrene standards. Differential scanning calorimetry (DSC) was performed on a TA Q200 DSC instrument in  $\text{N}_2$  with a heating rate of  $10^\circ\text{C/min}$ . Thermogravimetry analysis (TGA) was conducted on a TA Discovery TGA 55 thermal analysis system in  $\text{N}_2$  with a heating rate of  $10^\circ\text{C/min}$ .

### **Synthesis of methacrylamide monomer containing PFCB (PFCBMA)**

Firstly, the cross-dimer, 1-bromo-4-(1,2,2,3,3,4-hexafluoro-4-(4-methoxyphenoxy)-cyclobutoxy)benzene, was prepared by the cross-coupling reaction from 1-bromo -4-((1,2,2-trifluorovinyl)oxy)benzene and 1-methoxy-4-((1,2,2-trifluorovinyl) oxy)-benzene, which were obtained from 4-methoxyphenol, 4-bromophenol and 1,2-dibromotetrafluoroethane according to previous reports.<sup>1,2</sup>

The aminobiphenyl intermediate containing PFCB (PFCBNH<sub>2</sub>) was prepared by

Suzuki coupling reaction from 1-bromo-4-(1,2,2,3,3,4-hexafluoro-4-(4-methoxyphenoxy)cyclobutoxy)benzene and 4-aminophenylboronic acid pinacol ester. Into a 500 mL round-bottom flask were added the cross-dimer (20.2506 g, 44.3 mmol), 4-aminophenylboronic acid pinacol ester (12.0354 g, 54.9 mmol),  $K_2CO_3$  (24.5244 g, 177.4 mmol), ethanol (50 mL) and toluene (150 mL). After degassing the resulting mixture via  $N_2$  bubbling for 30 minutes, tetrakis(triphenylphosphine)palladium(0) (2.0460 g, 1.77 mmol) was charged. The reaction mixture was then heated to 85°C for 8 hours under  $N_2$ . The solvents were removed by rotary evaporation, and the residue was subjected to column chromatography (eluent: *n*-hexane/ethyl acetate, v:v = 1:1) to afford PFCBNH<sub>2</sub> as a grey solid (10.3417 g, 49.7 % yield). <sup>1</sup>H NMR (DMSO-*d*<sub>6</sub>):  $\delta$  (ppm): 3.78 (s, 3H), 5.27 (s, 2H), 6.62 (dd, 2H), 6.98 (m, 2H), 7.20 (dd, 2H), 7.33 (dd, 2H), 7.59 (m, 2H). <sup>19</sup>F NMR (DMSO-*d*<sub>6</sub>):  $\delta$  (ppm): -128.55~132.17.

The methacrylamide monomer containing PFCB was prepared by amidation reaction between PFCBNH<sub>2</sub> and methacryloyl chloride. Into a 500 mL round-bottom flask were added methacryloyl chloride (2.2 mL, 5.1 mmol), TEA (6.20 mL, 10.0 mmol) and THF (175 mL). After the mixture was cooled in an ice-water bath, a solution of PFCBNH<sub>2</sub> (10.3300 g, 5.0 mmol) in THF (60 mL) was added dropwise via syringe. The resulting mixture was warmed to room temperature and allowed to stir for another 12 hours followed by adding water to quench the reaction. THF was removed by rotary evaporation and the residue was extracted by 150 mL of CH<sub>2</sub>Cl<sub>2</sub>. The organic phase was washed with 5% aqueous  $K_2CO_3$  (150 mL×2) as well as brine (150 mL×2), dried

over anhydrous  $\text{MgSO}_4$  and filtered. After  $\text{CH}_2\text{Cl}_2$  was evaporated, the crude product was purified by column chromatography (eluent: *n*-hexane/ethyl acetate, v:v = 5:1) to afford PFCBMA as a white powder (1.7475 g, 65% yield).  $^1\text{H}$  NMR ( $\text{CDCl}_3$ ):  $\delta$  (ppm): 2.08 (s, 3H), 3.78 (d, 3H), 5.49 and 5.81 (2H), 6.82 (m, 2H), 7.10 (m, 2H), 7.20 (m, 2H), 7.53 (m, 4H), 7.56 (s, 1H), 7.63 (d, 2H).  $^{13}\text{C}$  NMR ( $\text{CDCl}_3$ ): 18.8, 55.6, 114.6, 118.5, 119.9, 120.1, 120.5, 127.5, 128.1, 136.0, 137.3, 140.9, 146.2, 152.0, 157.0, 166.7.  $^{19}\text{F}$  NMR ( $\text{CDCl}_3$ - $d_6$ ):  $\delta$  (ppm): -128.3~-131.6. ESI-MS:  $([\text{M}+\text{H}]^+)$  calcd as  $\text{C}_{27}\text{H}_{22}\text{NO}_8\text{F}_6 = 538.14$  m/z (%): 538.14 (100).

### Synthesis of dimethacrylamide monomer containing PFCB (MAPFCBMA)

Firstly, the bis(4-biphenylamine) compound containing PFCB ( $\text{PFCB}(\text{NH}_2)_2$ ) was prepared by Suzuki coupling reaction from 1-bromo-4-(1,2,2,3,3,4-hexafluoro-4-(4-methoxyphenoxy)cyclobutoxy)benzene and 4-aminophenylboronic acid pinacol ester according to a previous report.<sup>3</sup>

The dimethacrylamide monomer containing PFCB was prepared by amidation reaction between  $\text{PFCB}(\text{NH}_2)_2$  and methacryloyl chloride. Into a 500 mL round-bottom flask were added methacryloyl chloride (5.54 mL, 57.2 mmol), TEA (13.0 mL, 93.8 mmol) and THF (170 mL). After the mixture was cooled in an ice-water bath, a solution of  $\text{NH}_2\text{PFCBNH}_2$  (12.4923 g, 23.5 mmol) in THF (60 mL) was added dropwise via syringe. The resulting mixture was warmed to room temperature and allowed to stir for another 12 hours followed by adding water to quench the reaction. THF was removed by rotary evaporation and the residue was extracted by 150 mL of  $\text{CH}_2\text{Cl}_2$ . The organic

phase was washed with 5% aqueous  $\text{K}_2\text{CO}_3$  (150 mL $\times$ 2) as well as brine (150 mL $\times$ 2), dried over anhydrous  $\text{MgSO}_4$  and filtered. After  $\text{CH}_2\text{Cl}_2$  was evaporated, the crude product was purified by column chromatography (eluent: *n*-hexane/ethyl acetate, v:v = 1:1) to afford MAPFCBMA as a white powder (8.1062 g, 52% yield).  $^1\text{H}$  NMR ( $\text{DMSO}-d_6$ ):  $\delta$  (ppm): 9.87 (2H), 7.79 (4H), 7.75 (4H), 7.63 (4H), 7.29 (4H), 5.82 (2H), 5.53 (2H), 1.96 (6H).  $^{13}\text{C}$  NMR ( $\text{DMSO}-d_6$ ): 18.8, 118.5, 120.1, 120.5, 126.8, 128.1, 133.6, 137.4, 138.8, 140.4, 151.0, 167.0.  $^{19}\text{F}$  NMR ( $\text{DMSO}-d_6$ ):  $\delta$  (ppm): -127.7 to -131.2.

### **Copolymerization of PFCBMA and MMA**

PPFCBMA-*co*-PMMA copolymers were prepared by copolymerization of PFCBMA and MMA with various feed ratios ( $[\text{PFCBMA}]:[\text{MMA}] = 1:5, 1:10$  and  $1:15$ ). Take PPFCBMA-*co*-PMMA-1 as an example, the procedure is as below.

AIBN (78.7 mg, 0.480 mmol) was firstly added to a 25 mL Schlenk flask (flame-dried under vacuum prior to use) sealed with a rubber septum for degassing. Next, PFCBMA (4.0120 g, 7.46 mmol), MMA (4.1 mL, 38.6 mmol) and DMF (17 mL) were introduced via a gastight syringe. The solution was degassed by five freeze-pump-thaw cycles followed by immersing the flask into an oil bath preset at 60°C to start the polymerization. The polymerization was terminated by putting the flask into liquid nitrogen after 15 hours. After repeated purification by dissolving in DMF and precipitating in methanol three times, 5.1487 g (65%) of white powder, PPFCBMA-*co*-

PMMA-1, was obtained after drying *in vacuo*. GPC:  $M_n = 57,600$  g/mol,  $M_w/M_n = 1.72$ .

$^1\text{H}$  NMR ( $\text{CDCl}_3$ ):  $\delta$  (ppm): 7.48, 7.40, 7.16, 7.07, 6.78, 3.72, 3.57, 3.47, 1.64-2.22, 0.71-1.50.  $^{13}\text{C}$  NMR ( $\text{CDCl}_3$ ):  $\delta$  (ppm): 177.9, 177.2, 157.1, 151.8, 146.0, 137.6, 136.3, 128.1, 127.6, 120.9, 120.6, 118.9, 114.6, 54.5, 51.9, 44.7, 18.8, 16.6.  $^{19}\text{F}$  NMR ( $\text{CDCl}_3$ ):  $\delta$  (ppm): -128.2 ~ -132.0. FT-IR (KBr):  $\nu$  ( $\text{cm}^{-1}$ ): 3612, 3395, 2995, 2950, 2841, 1732, 1507, 1448, 1317, 1296, 1247, 1195, 1149, 962, 827, 750.

### **Copolymerization of MAPFCBMA and MMA**

Cross-PFCB-PMMA copolymers were prepared by copolymerization of MAPFCBMA and MMA with various feed ratios ( $[\text{MAPFCBMA}]:[\text{MMA}] = 1:5, 1:10$  and  $1:15$ ). Take Cross-PFCBMA-1 as an example, the procedure is as below.

Into a dried Schlenk tube were added MAPFCBMA (1.8670 g, 2.8 mmol), MMA (1.50 mL, 14.0 mmol), AIBN (27.6 mg, 0.168 mmol) and DMF (4 mL). The mixture was degassed by three cycles of freezing-pumping-thawing. The Schlenk tube was kept in a preheated oil bath at  $70^\circ\text{C}$  for 24 hours. After cooling to room temperature, the mixture was crushed and washed with methanol several times. 2.8435 g of white powder (87%) was obtained after drying *in vacuo*. FT-IR (KBr):  $\nu$  ( $\text{cm}^{-1}$ ): 2992, 2952, 2922, 2851, 1725, 1495, 1432, 1386, 1264, 1193, 1145, 960, 820, 749.

### **Copolymerization of ethylene dimethacrylate and MMA**

Into a dried Schlenk tube were added EGDMA (0.568 g, 2.8 mmol), MMA (3.0 mL,

28.0 mmol), AIBN (50.6 mg, 0.308 mmol) and DMF (3.3 mL). The mixture was degassed by three cycles of freezing-pumping-thawing. The Schlenk tube was kept in a preheated oil bath at 70°C for 24 hours. After cooling to room temperature, the mixture was crushed and washed with methanol several times, affording 3.4456 g of white powder (100 %) after drying *in vacuo*.



## SUPPORTING FIGURES

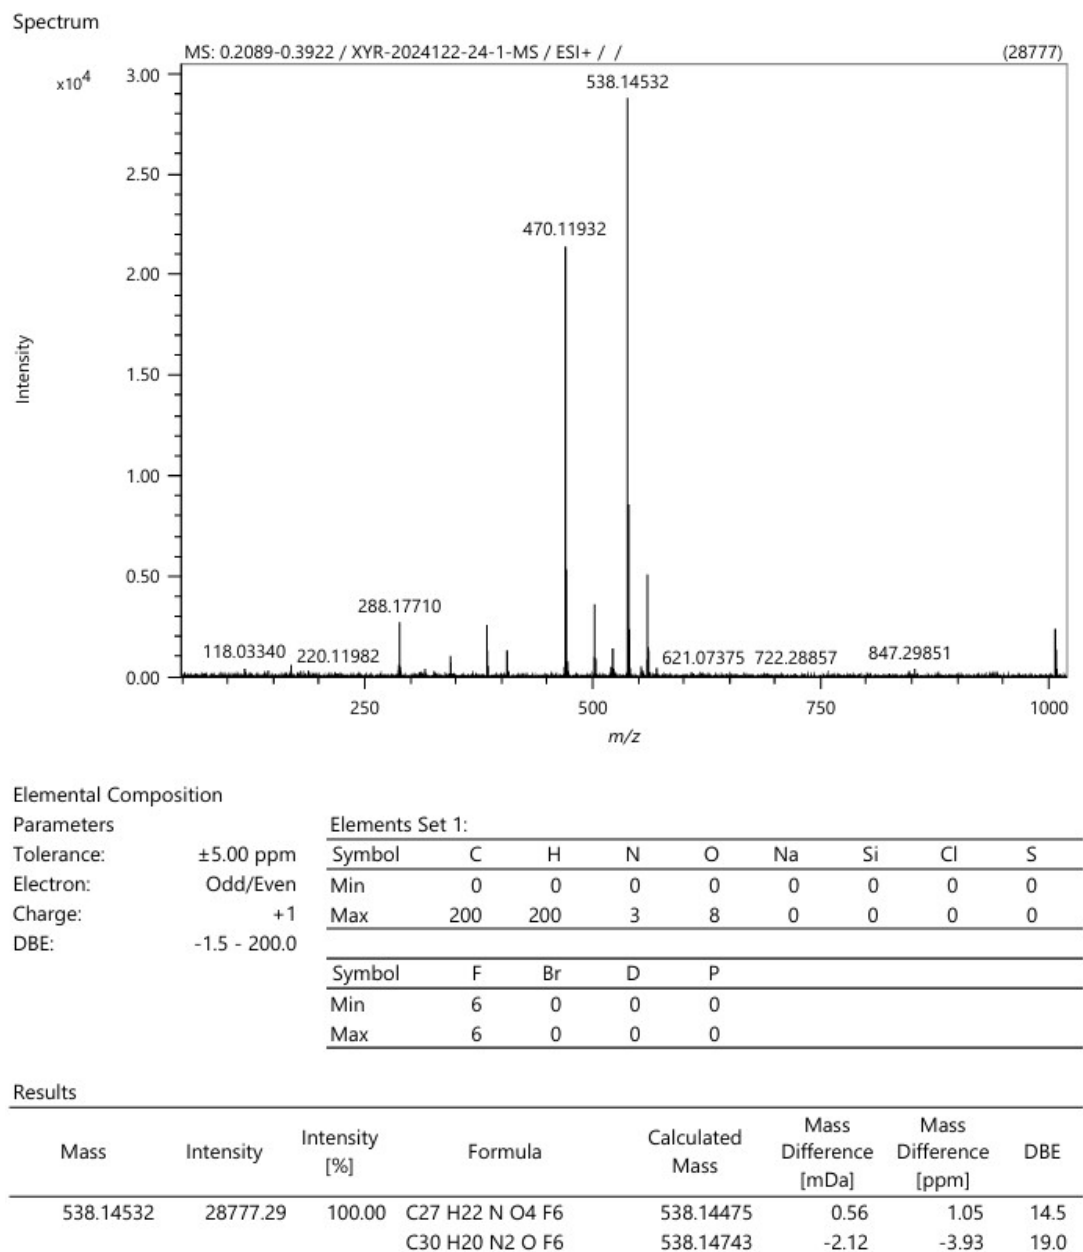

**Figure S1.** ESI-MS of PFCBMA monomer.

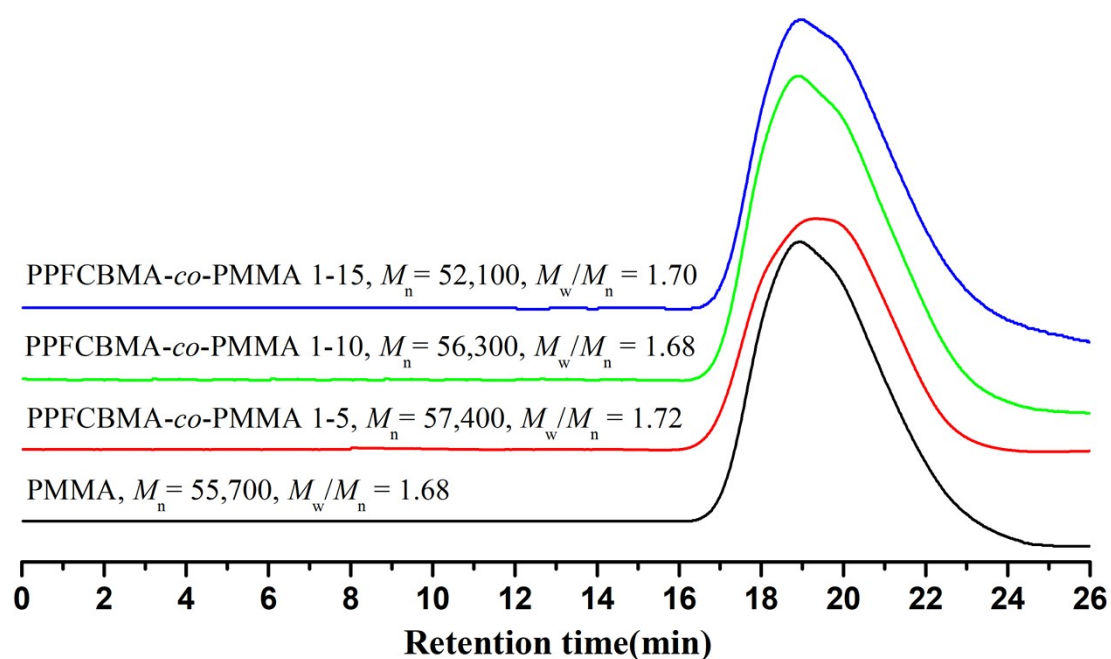

Figure S2. GPC curves of PPFCBMA-co-PMMA.

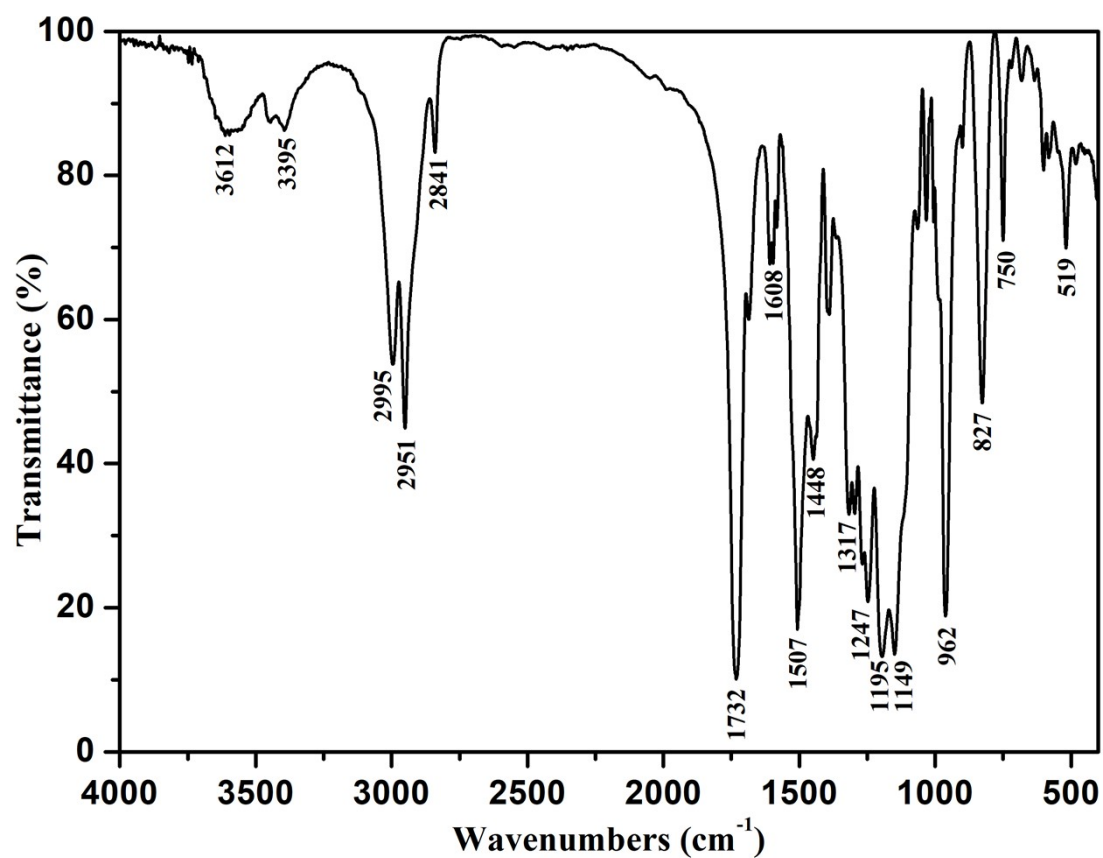

Figure S3. FT-IR spectrum of PPFCBMA-co-PMMA.

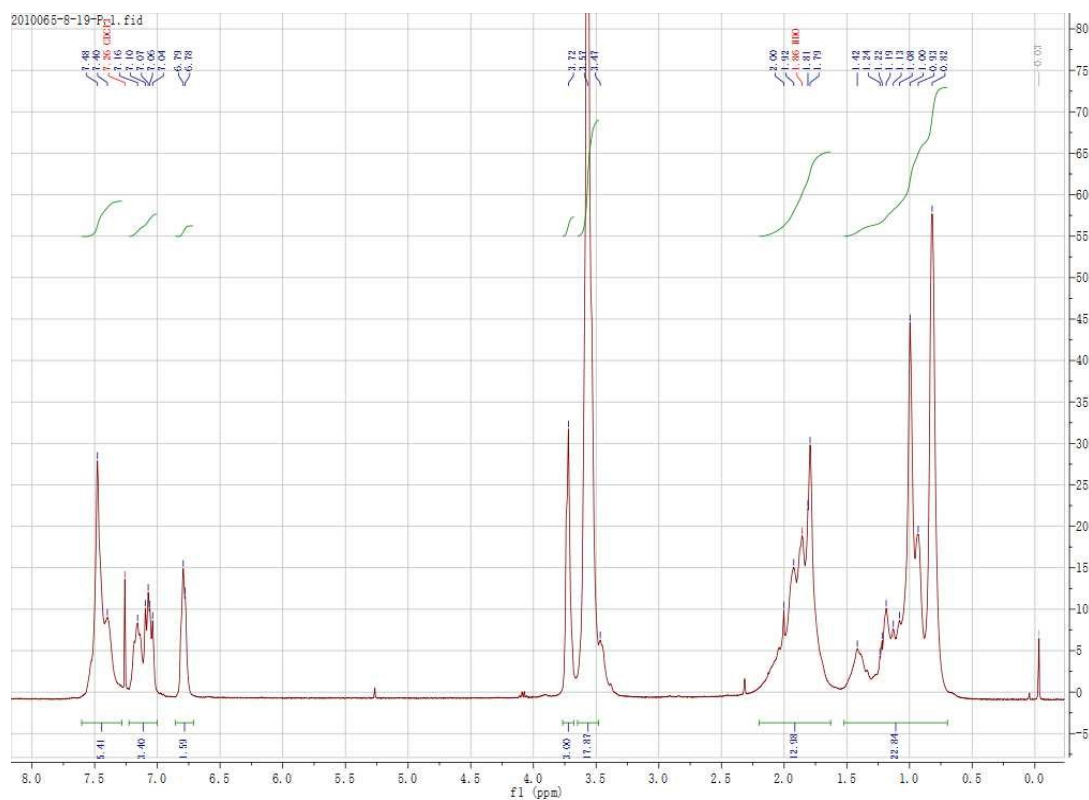

**Figure S4.**  $^1\text{H}$  NMR spectrum of PPFCBMA-*co*-PMMA 1-5 in  $\text{CDCl}_3$ .

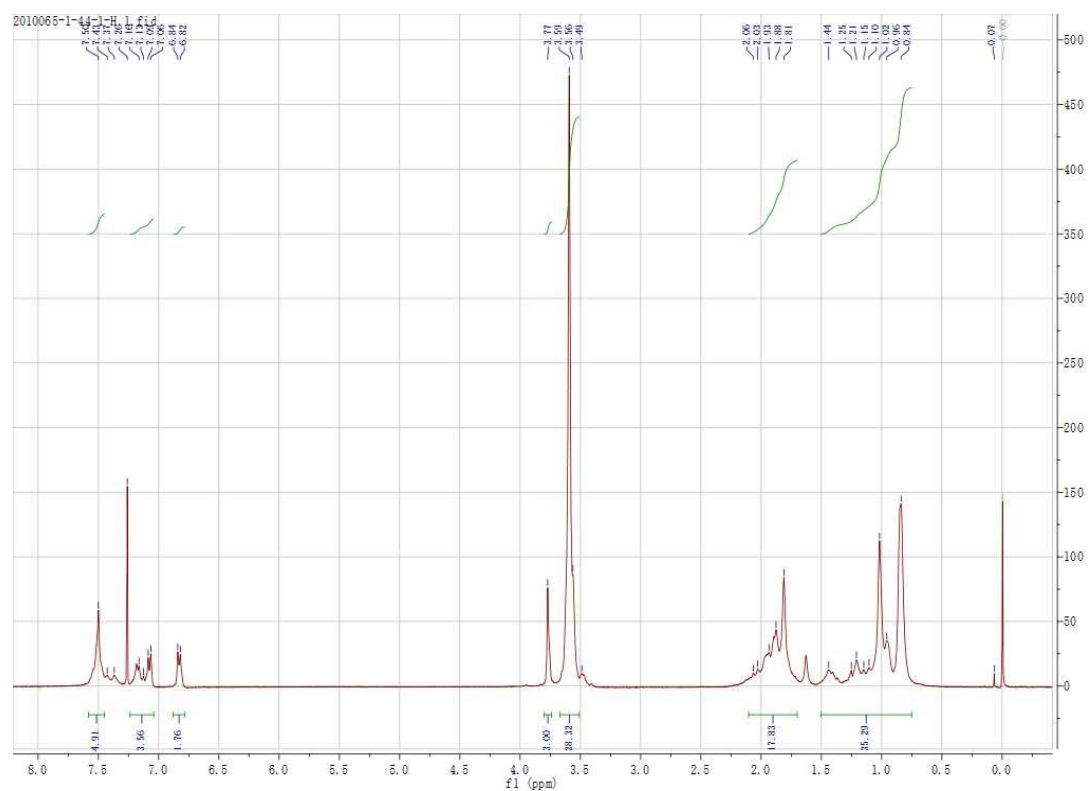

**Figure S5.**  $^1\text{H}$  NMR spectrum of PPFCBMA-*co*-PMMA 1-10 in  $\text{CDCl}_3$ .

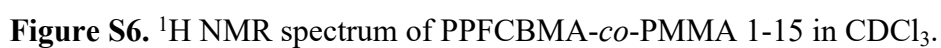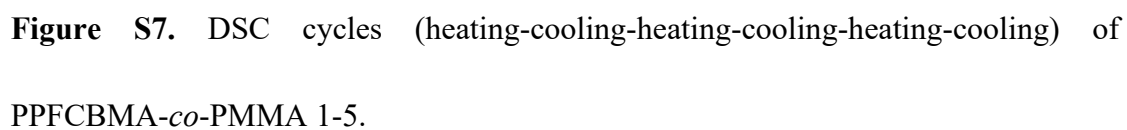

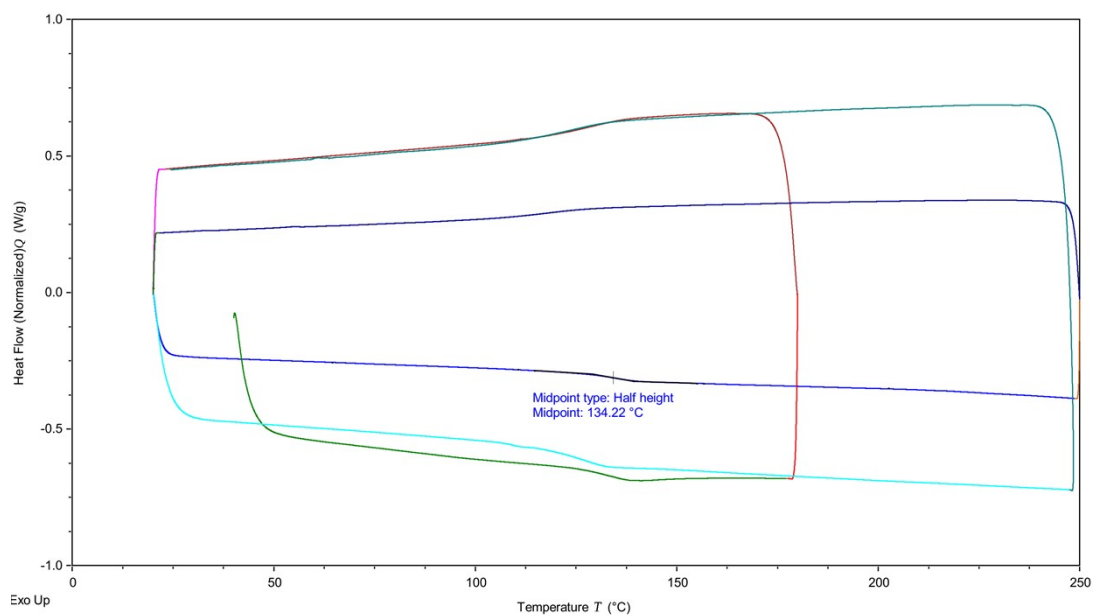

**Figure S8.** DSC cycles (heating-cooling-heating-cooling-heating-cooling) of PPF CBMA-co-PMMA 1-10.

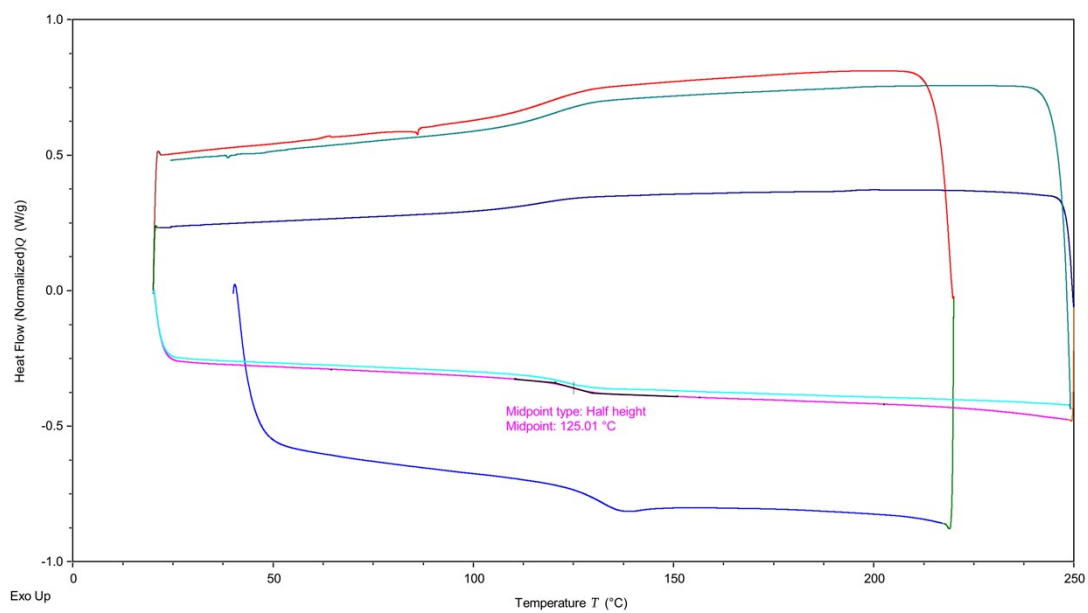

**Figure S9.** DSC cycles (heating-cooling-heating-cooling-heating-cooling) of PPF CBMA-co-PMMA 1-15.

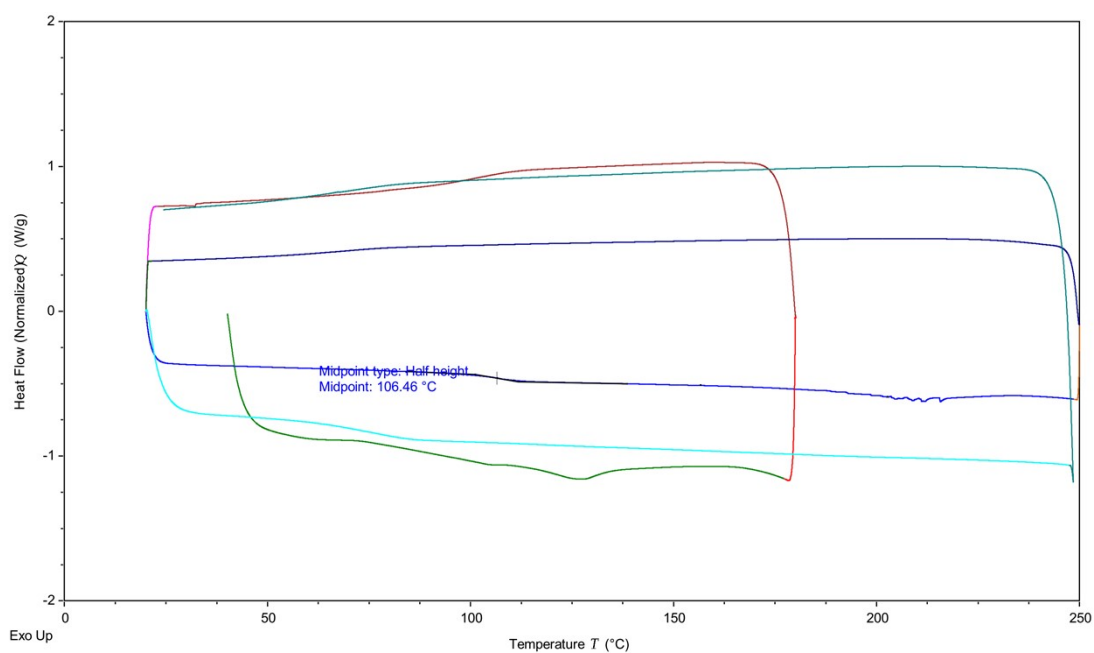

**Figure S10.** DSC cycles (heating-cooling-heating-cooling-heating-cooling) of PMMA.

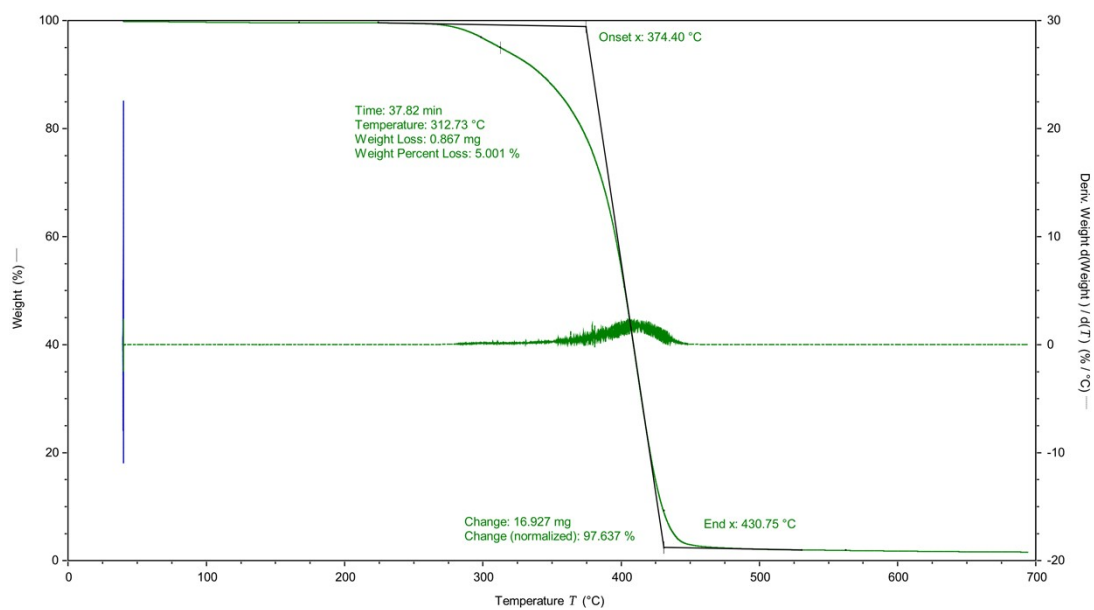

**Figure S11.** TGA curves (in N<sub>2</sub>) of PPFCBMA-co-PMMA 1-5 with a heating rate of 10°C/min.

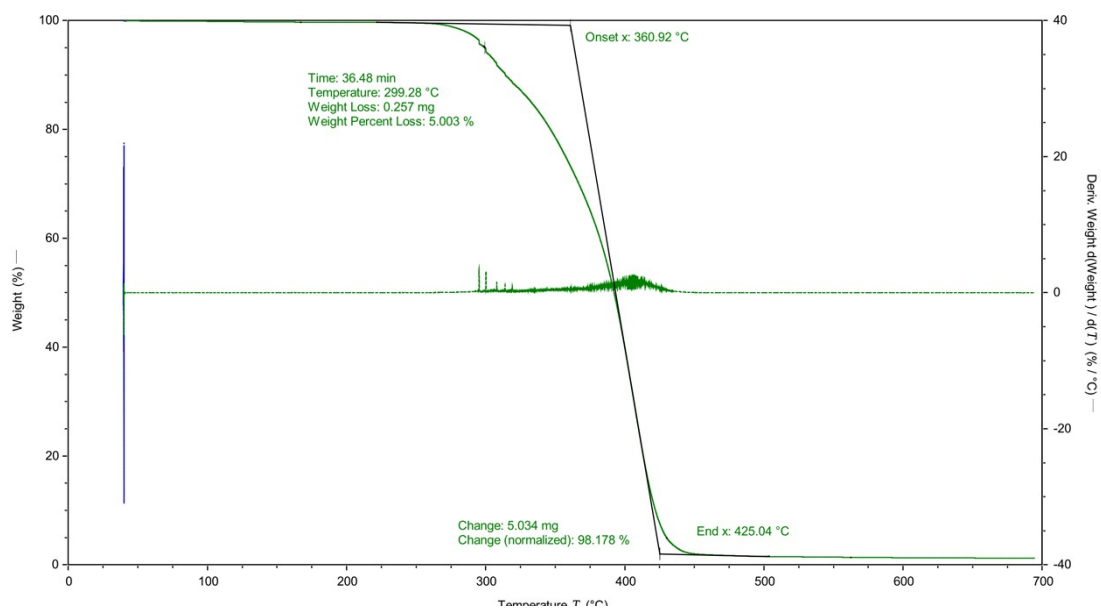

**Figure S12.** TGA curves (in N<sub>2</sub>) of PFFCBMA-*co*-PMMA 1-10 with a heating rate of 10°C/min.

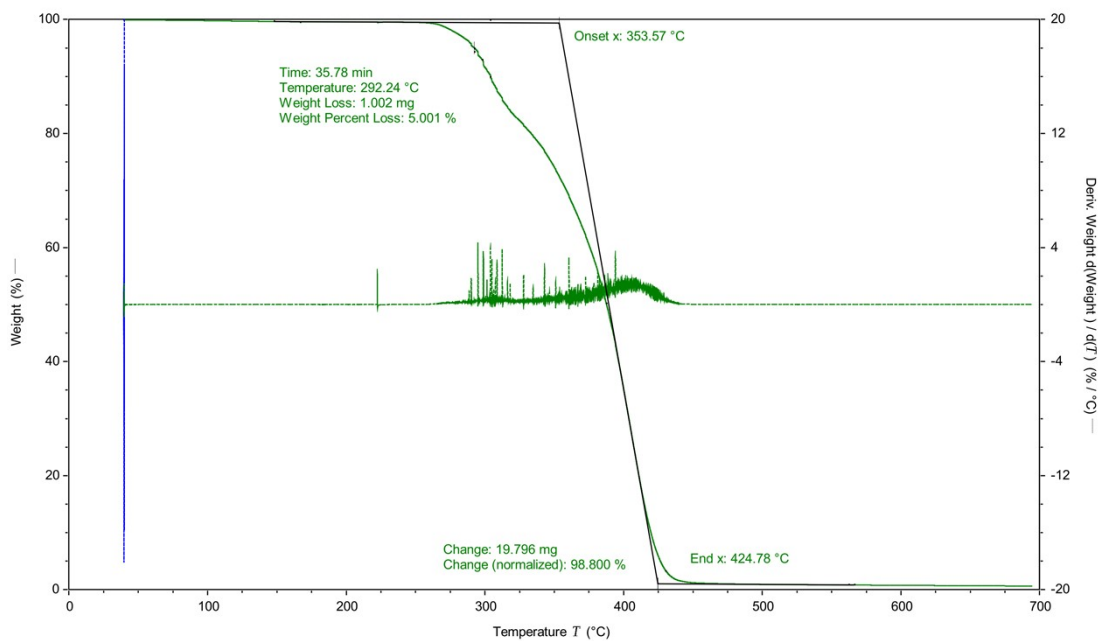

**Figure S13.** TGA curves (in N<sub>2</sub>) of PFFCBMA-*co*-PMMA 1-15 with a heating rate of 10°C/min.

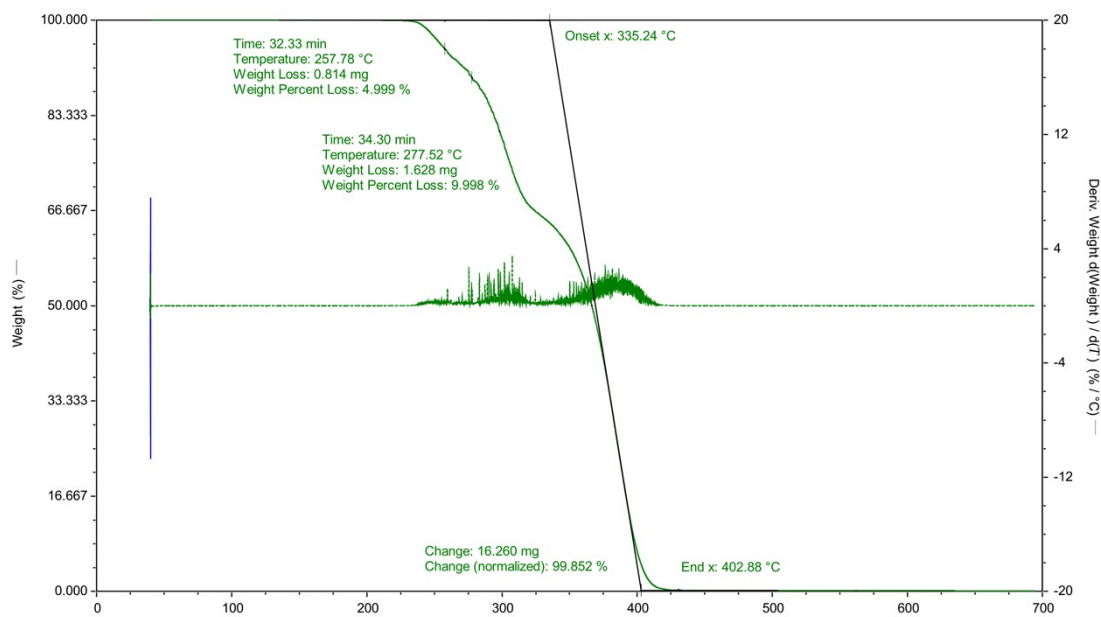

**Figure S14.** TGA curves (in N<sub>2</sub>) of PMMA with a heating rate of 10°C/min.

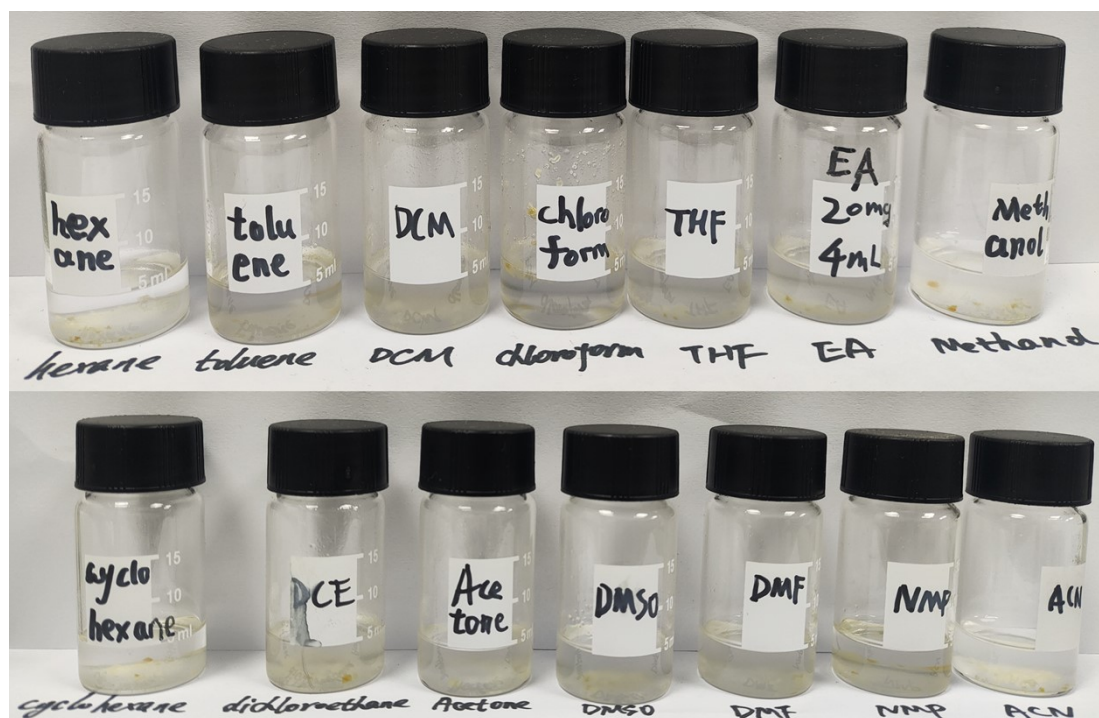

**Figure S15.** Photograph of solubility test of Cross-PFCB-PMMA copolymers.



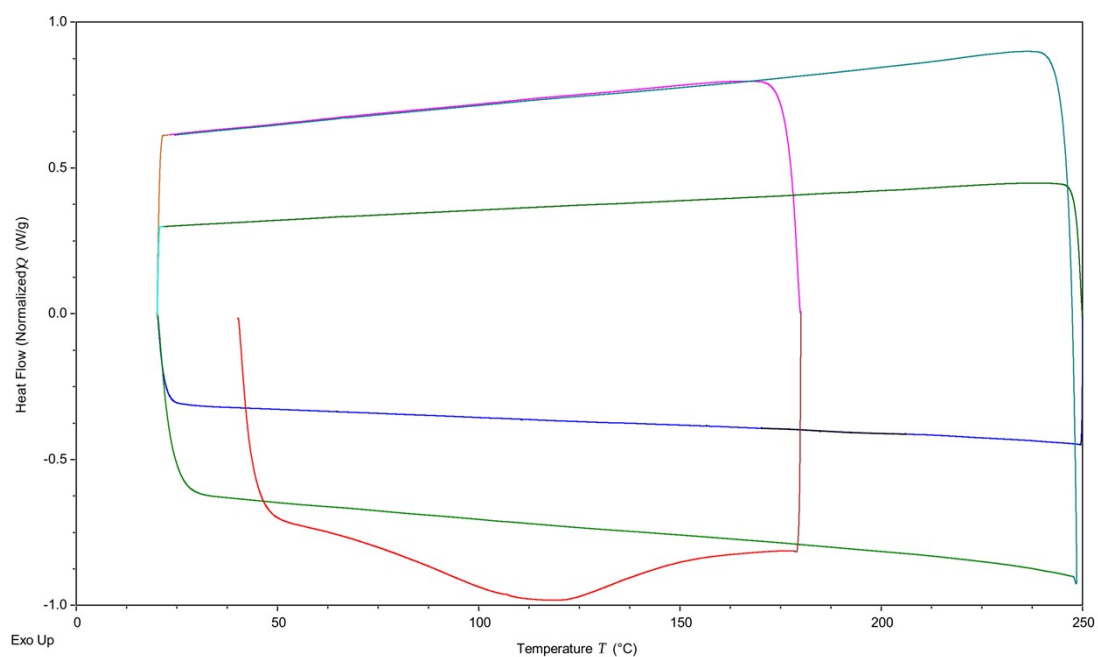

**Figure S16.** DSC cycles (heating-cooling-heating-cooling-heating-cooling) of Cross-PFCB-PMMA 1-5.

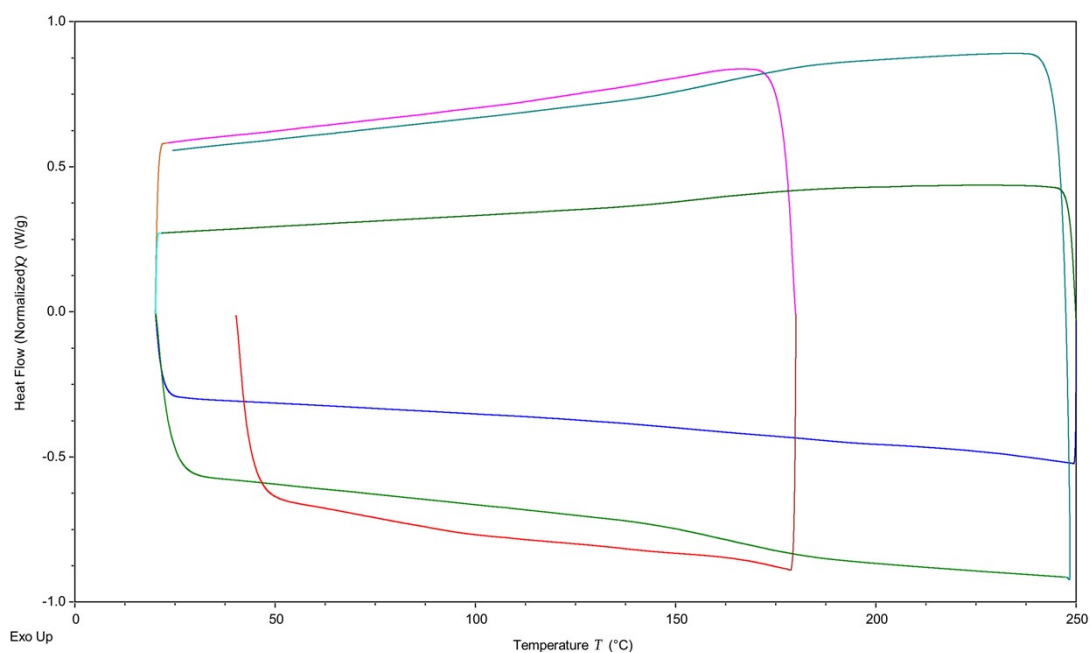

**Figure S17.** DSC cycles (heating-cooling-heating-cooling-heating-cooling) of Cross-PFCB-PMMA 1-10.

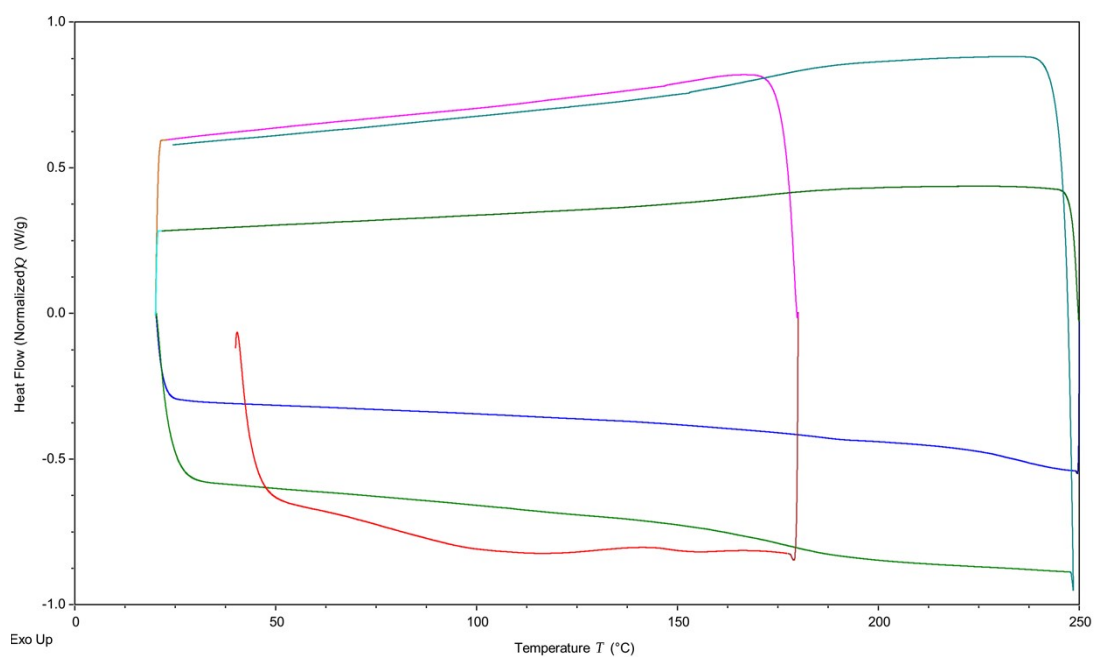

**Figure S18.** DSC cycles (heating-cooling-heating-cooling-heating-cooling) of Cross-PFCB-PMMA 1-15.

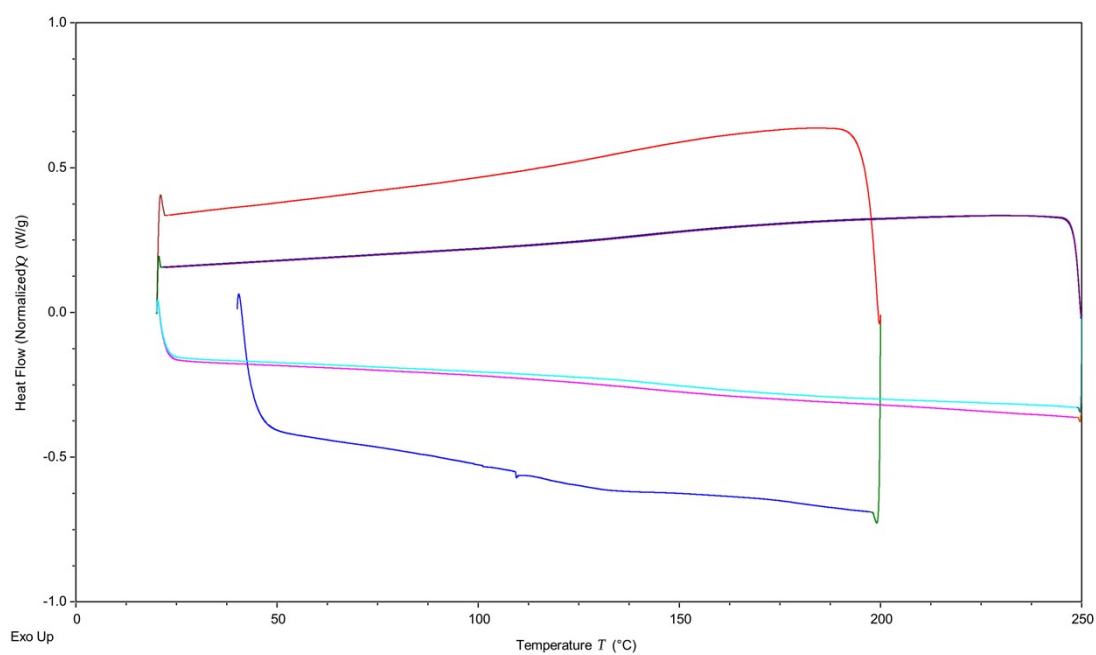

**Figure S19.** DSC cycles (heating-cooling-heating-cooling-heating-cooling) of Cross-PMMA.

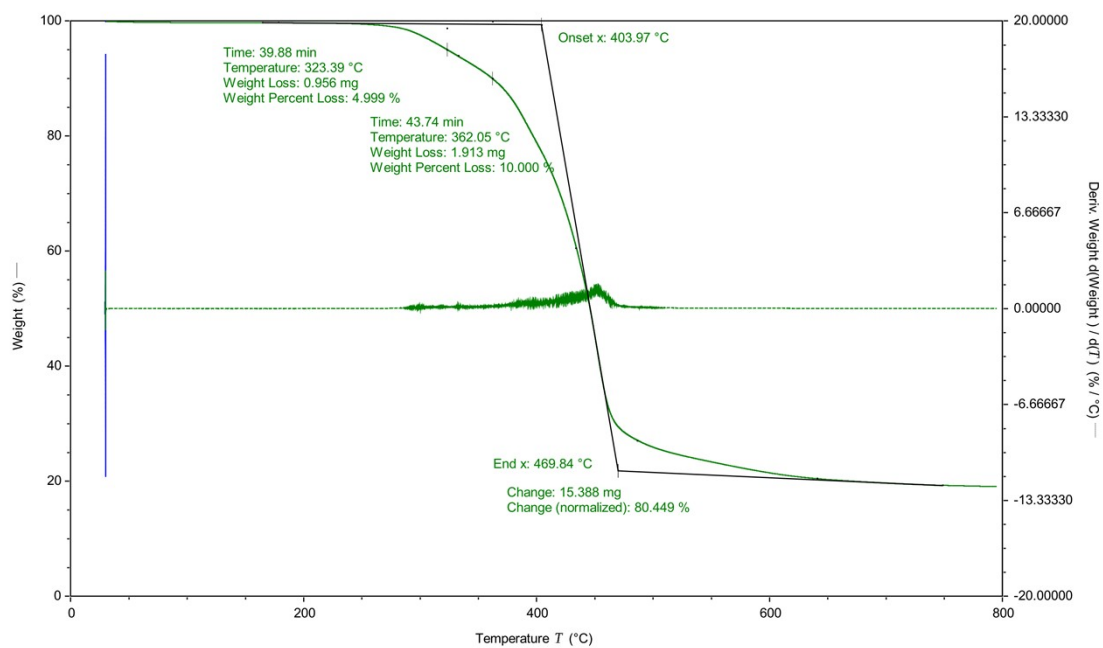

**Figure S20.** TGA curves (in N<sub>2</sub>) of Cross-PFCB-PMMA 1-5 with a heating rate of 10°C/min.

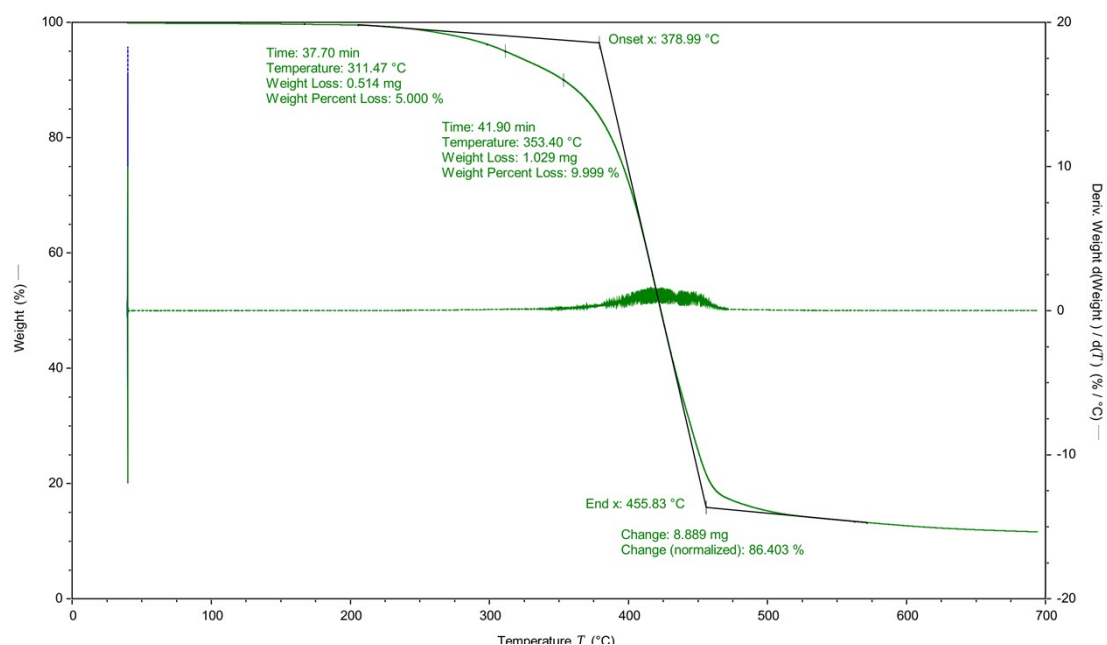

**Figure S21.** TGA curves (in N<sub>2</sub>) of Cross-PFCB-PMMA 1-10 with a heating rate of 10°C/min.

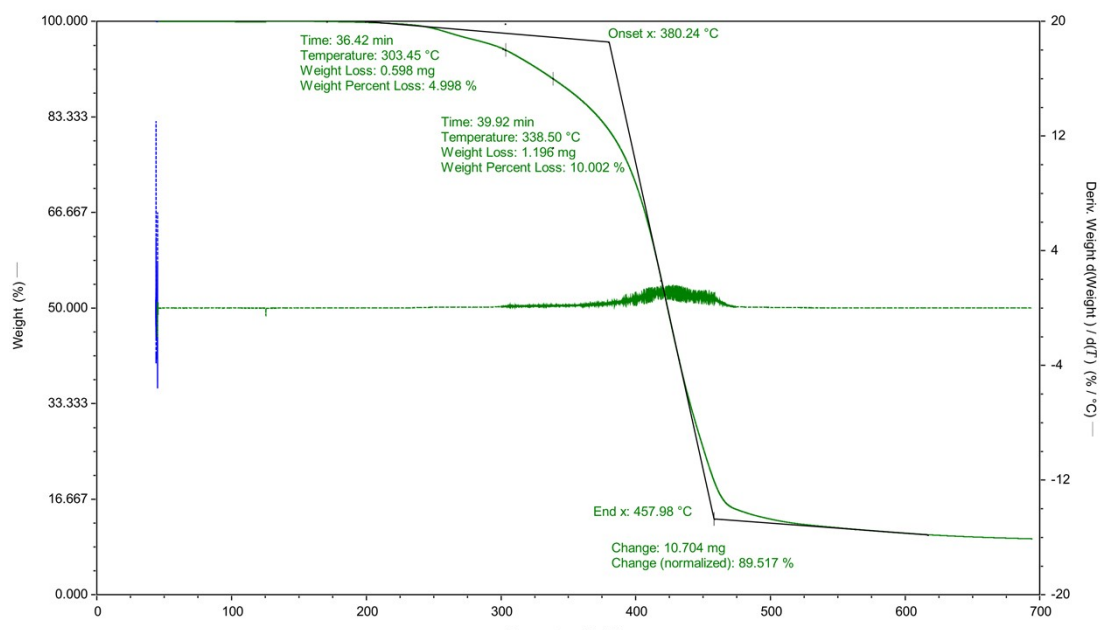

**Figure S22.** TGA curves (in  $N_2$ ) of Cross-PFCB-PMMA 1-15 with a heating rate of  $10^\circ\text{C}/\text{min}$ .

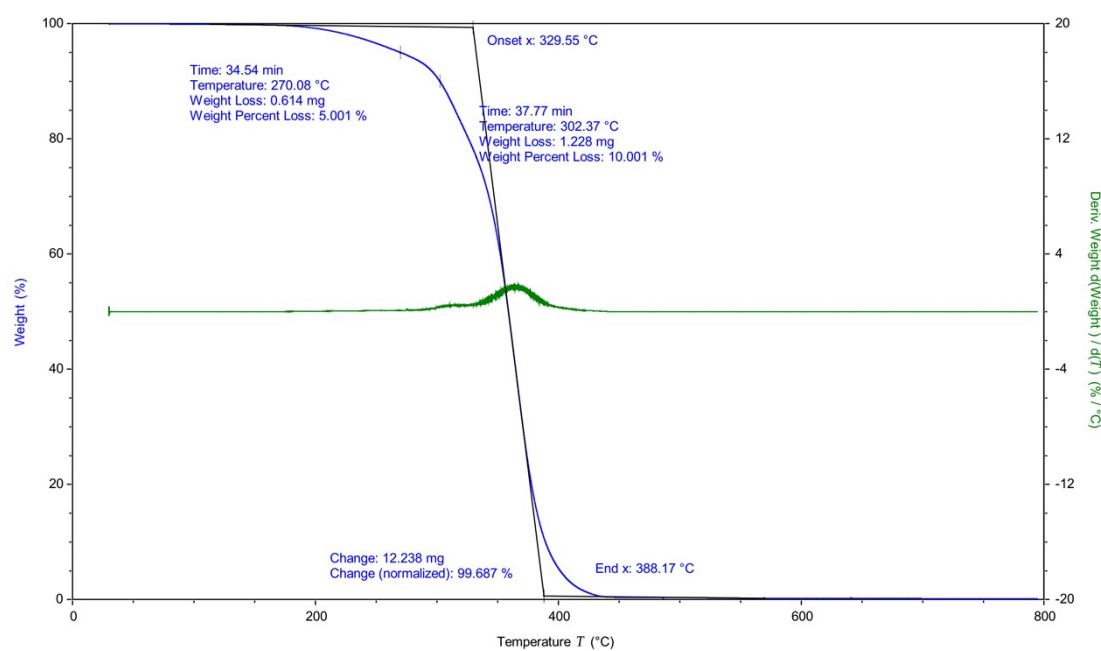

**Figure S23.** TGA curves (in  $N_2$ ) of Cross-PMMA with a heating rate of  $10^\circ\text{C}/\text{min}$ .

## References

- [1] Y. J. Li, S. Zhang, L. Tong, Q. N. Li, W. X. Li, G. L. Lu, H. Liu, X. Y. Huang, J. Fluorine Chem. 2009, 130, 354-360.
- [2] M. T. Zhou, G. X. Gu, S. Zhang, G. L. Lu, J. Xu, X. Y. Huang, *Eur. Polym. J.* **2019**, 120, 109250.
- [3] M. C. Jia, Y. J. Li, C. Q. He, X. Y. Huang, *ACS Appl. Mater. Interfaces*, **2016**, 8, 26352-26358.
